# Supplementary material for: Mucin-Producing Lobular Breast Carcinoma Metastasis to an Ovarian Fibroma: Histopathological and Immunohistochemical Analysis of a Rare Case and Literature Review
Source: MDPI journal article supplement (doi:10.3390/diagnostics14090953), 2024-04-30
Supplement: s1 [file s1]

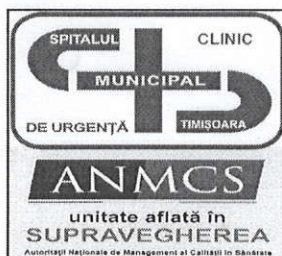

**SPITALUL CLINIC MUNICIPAL DE  
URGENȚĂ TIMIȘOARA**

Număr Operator de date cu caracter personal - 37058

Str. Hector Nr. 2 A, Timișoara, Timiș - RO, 300041

Tel : 0256/200048, 0256/221553, Fax : 0256/200046

<http://www.spitalul-municipal-timisoara.ro>

E-mail: [secretariat@smtm.ro](mailto:secretariat@smtm.ro) Cod fiscal: 4483447

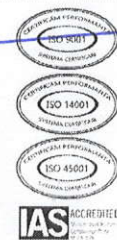

NR.E-628/31.01.2024

ACORDUL DOMNULUI CONF. DR. MALIȚA DANIEL CLAUDIU –  
MANAGERUL SPITALULUI CLINIC MUNICIPAL DE URGENȚĂ TIMIȘOARA,

Prin prezenta se confirmă acordul domnului MANAGER CONF. DR. MALIȚA DANIEL CLAUDIU privind desfasurarea protocolului de studiu: "A rare case of metastasis from mucin producing lobular breast carcinoma to an ovarian fibroma: a case report and review of the literature". -Serviciu Anatomie Patologică I

**Investigatori:** Conf.Univ.Dr.FAUR ALEXANDRA,MD ANATOMIE PATOLOGICĂ I

**AVIZ:** ȘEF SECȚIE CLINICĂ DE CHIRURGIE GENERALĂ II-ONCOLOGICĂ II

Conf.Univ.Dr.ILINA RAZVAN

**AVIZ:** ȘEF SERV. INFORMATICĂ ING. MUNTEANU ADINA

Acordul unitatii pentru desfasurarea studiului clinic este favorabil cu conditia respectării legislației în vigoare, a ghidurilor de bună practică, a legii drepturilor pacientului, a confidențialității Regulament nr. 679 din 27 aprilie 2016 privind protecția persoanelor fizice în ceea ce privește prelucrarea datelor cu caracter personal și privind libera circulație a acestor date și de abrogare a Directivei 95/46/CE (Regulamentul general privind protecția datelor), a publicării rezultatelor.

MANAGER,

CONF. DR. MALIȚA DANIEL CLAUDIU

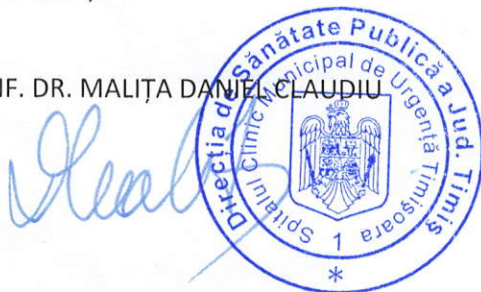

SERV. JURIDIC ȘI  
CONTENCIOS ADMINISTRATIV

ȘEF SERV. C.J. FODOR ADELINE
